# Supplementary material for: Curcumin mediates oxaliplatin-acquired resistance reversion in colorectal cancer cell lines through modulation of CXC-Chemokine/NF-κB signalling pathway
Source: PubMed Central journal article supplement (PMC4835769; doi:10.1038/srep24675), 2016-04-19
Supplement: srep24675-s1.pdf [file srep24675-s1.pdf]

## **Curcumin mediates oxaliplatin-acquired resistance reversion in colorectal cancer cell lines through modulation of CXC-Chemokine/NF- $\kappa$ B signalling pathway.**

Vicenç Ruiz de Porras<sup>1</sup>, Sara Bystrup<sup>1</sup>, Anna Martínez-Cardús<sup>2</sup>, Raquel Pluvinet<sup>3</sup>, Lauro Sumoy<sup>3</sup>, Lynne Howells<sup>7</sup>, Mark I. James<sup>7</sup>, Chinenye Iwuji<sup>7</sup>, José Luis Manzano<sup>1,4</sup>, Laura Layos, Cristina Bugés, Albert Abad<sup>6</sup> and Eva Martínez-Balibrea<sup>1,5\*</sup>

1. Translational research in digestive tumors group. Laboratory of Molecular Cancer Biology, Health Sciences Research Institute of the Germans Trias i Pujol Foundation (IGTP), Can Ruti Campus, Ctra. Can Ruti- Camí de les escoles s/n, 08916, Badalona, Spain
2. Cancer Epigenetics and Biology Program (PEBC), Bellvitge Biomedical Research Institute (IDIBELL), Gran Via de l'Hospitalet, 199. 08908 L'Hospitalet de Llobregat, Barcelona, Spain
3. Genomics and Bioinformatics Unit, Institute for Predictive and Personalized Medicine of Cancer (IMPPC), Can Ruti Campus, Ctra. Can Ruti- Camí de les escoles s/n, 08916, Badalona, Spain
4. Medical Oncology Service, Catalan Institute of Oncology (ICO) University Hospital Germans Trias i Pujol, Ctra. Can Ruti- Camí de les escoles s/n, 08916, Badalona, Spain.
5. Program Against Cancer Resistance (ProCURE), Catalan Institute of Oncology.
6. Oncology Unit, Hospital CIMA Sanitas, Barcelona, Catalonia, Spain.
7. Dept Cancer Studies, University of Leicester, Leicester Royal Infirmary, Lancaster Road, LE1 9HN, Leicester, UK.

## Supplementary Figure S1

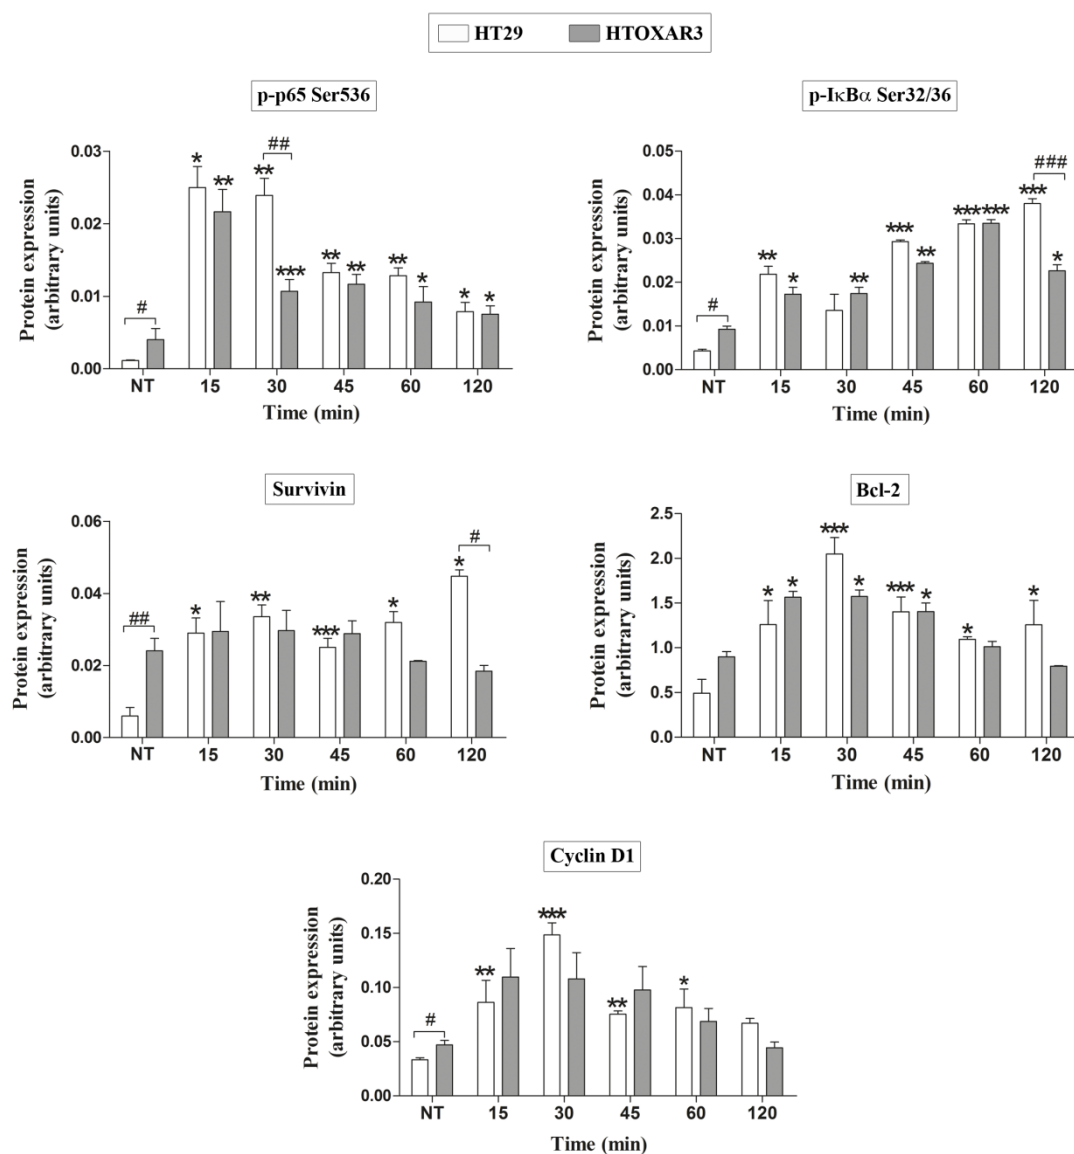

**Supplementary Fig. S1. Effect of OXA treatment on NF- $\kappa$ B activation in HT29 and HTOXAR3 cells.** Bar graphs showing levels (mean  $\pm$  SEM) of phosphorylated p65 (p-p65 Ser536) phosphorylated I $\kappa$ B $\alpha$  (p-I $\kappa$ B $\alpha$  Ser32/36), Survivin, Bcl-2 and Cyclin D1 in HT29 and HTOXAR3 cells after 10 or 30  $\mu$ M OXA treatment, respectively, for 0 to 120 min. Alpha-tubulin was used as endogenous control. Values are the result of at least three independent experiments. \*p-value < 0.05; \*\*p-value < 0.01; \*\*\*p-value < 0.001 relative to NT (Non-treated cells). #p-value < 0.05, ##p-value < 0.01 relative to corresponding protein expression in HT29 cell line.

## Supplementary Figure S2

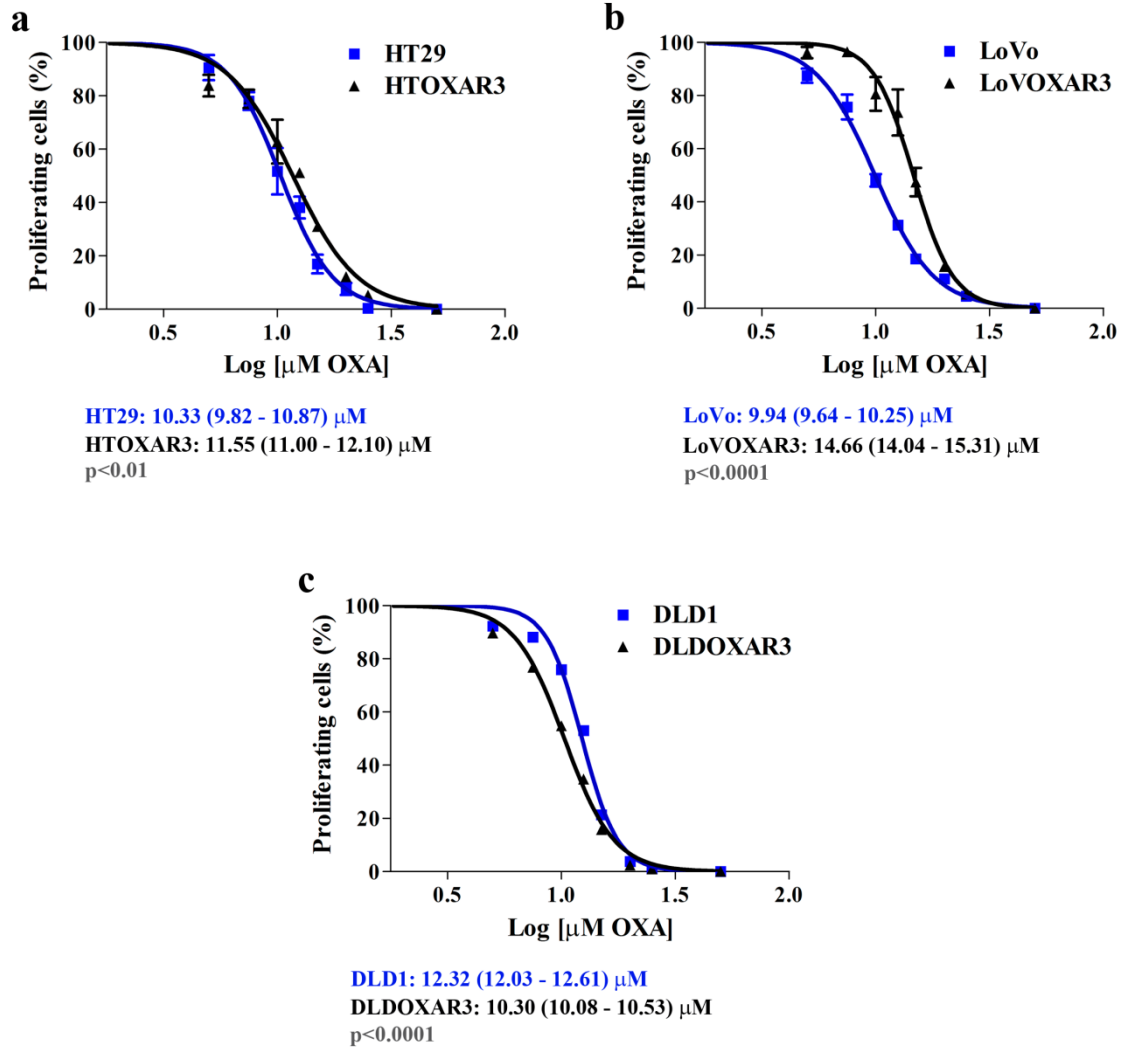

### Supplementary Fig. S2. Effect of Curcumin treatment on CRC cells proliferation.

(a) Dose response curves for HT29/HTOXAR3, (b) LoVo/LoVOXAR3 and (c) DLD1/DLDOXAR3 after Curcumin treatment at 0-50  $\mu\text{M}$  for 24 h (mean  $\pm$  SEM). IC50 values are indicated as mean (95% CI). All results were obtained from at least 3 independent experiments.

## Supplementary Figure S3

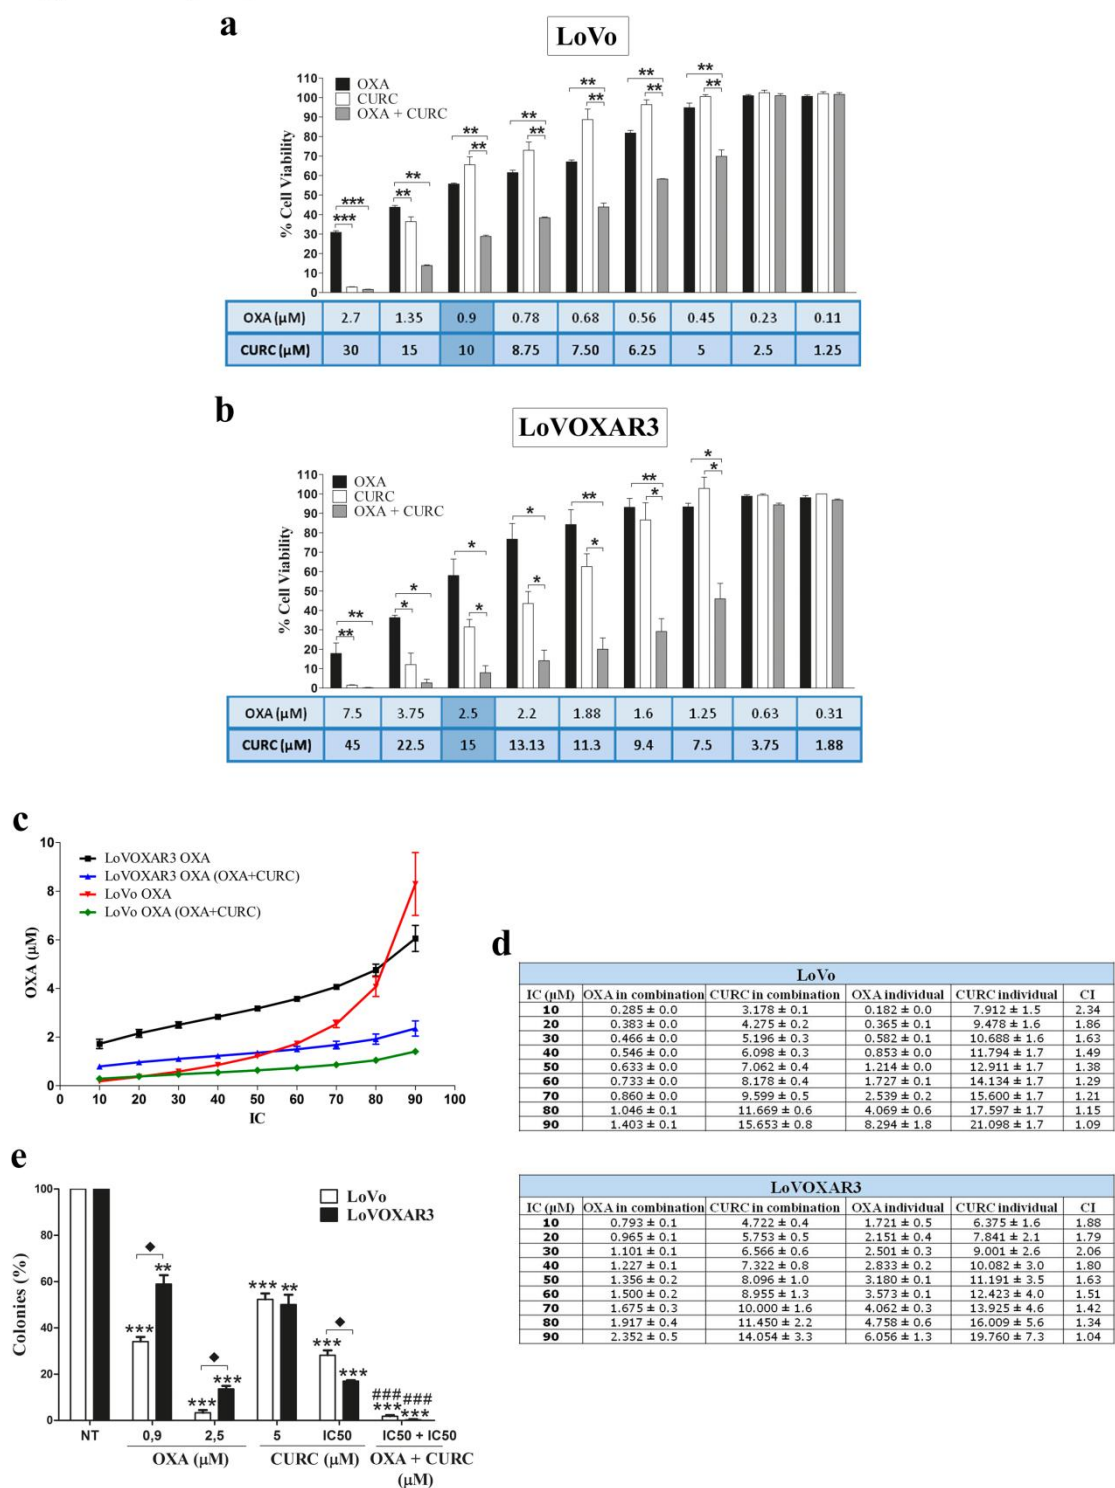

**Supplementary Fig. S3. Combination of OXA and Curcumin in LoVo and LoVORAR3 cell lines.** (a) Bar graphs representing mean  $\pm$  SEM percentage of cell viability after a 24-hour treatment with OXA, Curcumin or their concomitant combination at the indicated doses in LoVo and (b) LoVOXAR3 cells. (c) OXA doses

(mean  $\pm$  SEM) corresponding to indicated inhibitory concentrations (IC) in LoVo and LoVOXAR3 cells as a single agent or when combined with Curcumin concomitantly for 24 h. **(d)** OXA and Curcumin doses (mean  $\pm$  SD) corresponding to the indicated inhibitory concentrations (IC) when given as single agents or in a 24h-concomitant schedule in LoVo (*top*) and LoVOXAR3 (*bottom*). CI represents the combination index values in each case. **(e)** Bar graph representing the percentage (mean  $\pm$  SEM) of colonies in LoVo and LoVOXAR3 cells after 24 h of the indicated treatments. \*p-value < 0.05; \*\*p-value < 0.01; \*\*\*p-value < 0.001 relative to NT (Non-treated cells). #p-value < 0.05 relative to OXA individual treatment. ◆p-value < 0.05 as compared to LoVo.

### Supplementary Figure S4

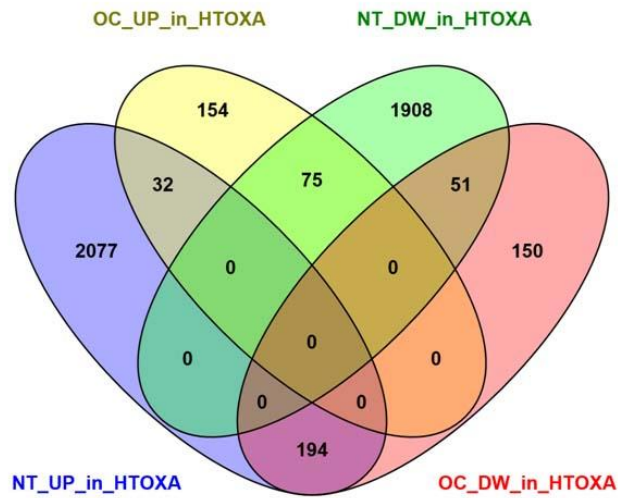

**Supplementary Fig. S4.** Venn diagram depicting the numbers of genes in the intersection between the the following conditions: OC\_UP\_in\_HTOXA (genes with increased differential expression between oxaliplating plus curcumin treatment relative to untreated in HTOXAR3 compared to HT29), OC\_DW\_in\_HTOXA (genes with decreased differential expression between oxaliplating plus curcumin treatment relative to untreated in HTOXAR3 compared to HT29), NT\_UP\_in\_HTOXA HTOXA (genes upregulated in HTOXAR3 compared to HT29 under untreated basal conditions), and NT\_DW\_in\_HTOXA (genes downregulated in HTOXAR3 compared to HT29 under untreated basal conditions).

## Supplementary Figure S5

**a**

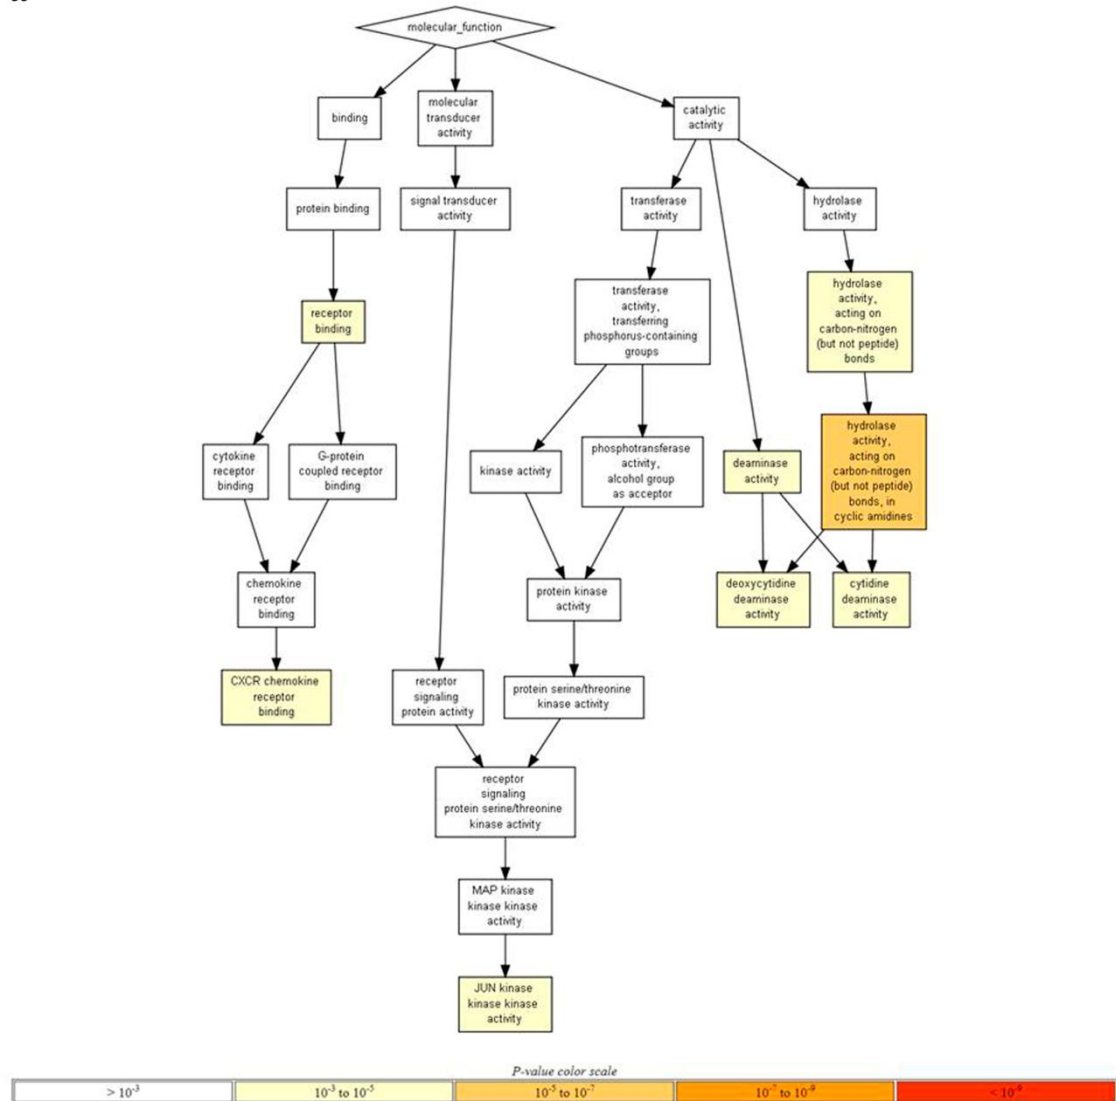

**b**

| Gene Set Name                                                                   | # Genes in Gene Set (K) | # Genes in Overlap (k) | k/K    | p-value  | FDR q-value |
|---------------------------------------------------------------------------------|-------------------------|------------------------|--------|----------|-------------|
| DEAMINASE_ACTIVITY                                                              | 14                      | 3                      | 0.2143 | 1.49E-05 | 4.53E-03    |
| HYDROLASE_ACTIVITY_ACTING_ON_CARBON_NITROGEN_NOT_PEPTIDEBONDSIN_CYCLIC_AMIDINES | 16                      | 3                      | 0.1875 | 2.29E-05 | 4.53E-03    |
| ISOMERASE_ACTIVITY                                                              | 35                      | 3                      | 0.0857 | 2.54E-04 | 2.52E-02    |
| RECEPTOR_BINDING                                                                | 377                     | 7                      | 0.0186 | 3.91E-04 | 2.52E-02    |
| CHEMOKINE_ACTIVITY                                                              | 42                      | 3                      | 0.0714 | 4.38E-04 | 2.52E-02    |
| CHEMOKINE_RECEPTOR_BINDING                                                      | 43                      | 3                      | 0.0698 | 4.70E-04 | 2.52E-02    |
| TRANSMEMBRANE_RECEPTOR_PROTEIN_TYROSINE_KINASE_ACTIVITY                         | 43                      | 3                      | 0.0698 | 4.70E-04 | 2.52E-02    |
| SIALYLTRANSFERASE_ACTIVITY                                                      | 10                      | 2                      | 0.2    | 5.39E-04 | 2.52E-02    |
| HYDROLASE_ACTIVITY_ACTING_ON_CARBON_NITROGEN_NOT_PEPTIDEBONDS                   | 46                      | 3                      | 0.0652 | 5.74E-04 | 2.52E-02    |
| CYTOKINE_ACTIVITY                                                               | 113                     | 4                      | 0.0354 | 6.94E-04 | 2.75E-02    |
| TRANSMEMBRANE_RECEPTOR_PROTEIN_KINASE_ACTIVITY                                  | 51                      | 3                      | 0.0588 | 7.77E-04 | 2.80E-02    |
| G_PROTEIN_COUPLED_RECEPTOR_BINDING                                              | 54                      | 3                      | 0.0556 | 9.18E-04 | 3.03E-02    |
| PROTEIN_TYROSINE_KINASE_ACTIVITY                                                | 63                      | 3                      | 0.0476 | 1.44E-03 | 4.38E-02    |
| STRUCTURAL_MOLECULE_ACTIVITY                                                    | 244                     | 5                      | 0.0205 | 1.75E-03 | 4.95E-02    |

**Supplementary Fig. S5. Functional enrichment analysis.** (a) Functional enrichment analysis of the 194 gene list up-regulated in HTOXAR3 at basal conditions and downregulated after OXA+Curcumin treatment (b). Significant GO molecular function terms enriched in the 194 gene list.

**Supplementary Table S1**

|              | Forward primer (5'-3')     | Reverse primer (5'-3')     |
|--------------|----------------------------|----------------------------|
| <b>CXCL8</b> | TCTTGGCAGCCTTCCTGATTC      | GTGTGGTCCACTCTCAATCACTCT   |
| <b>CXCL1</b> | AACCCCAAGTTAGTTCAATCTGGA   | CATGTTGCAGGCTCCTCAGAA      |
| <b>CXCL2</b> | TCAAACCCAAGTTAGTTCAATCCTGA | GCTGACATGTGATATGTCATCACGAA |

**Supplementary Table S1.** List of primers pairs used in RT-qPCR assay.

**Supplementary Table S2**

|                                   | Comparisons                                            | total regulated genes | UP   | DOWN |
|-----------------------------------|--------------------------------------------------------|-----------------------|------|------|
| within cell line HT29             | HT29_Oxaliplatin_vs_untreated                          | 5726                  | 2980 | 2746 |
|                                   | HT29_Oxaliplatin_plus_curcumin_vs_untreated            | 6622                  | 3420 | 3202 |
|                                   | HT29_Oxaliplatin_plus_curcumin_vs_oxaliplatin          | 2447                  | 1330 | 1117 |
| within cell line HTOXA            | HTOXA_Oxaliplatin_vs_untreated                         | 4022                  | 2095 | 1927 |
|                                   | HTOXA_Oxaliplatin_plus_curcumin_vs_untreated           | 6295                  | 3194 | 3101 |
|                                   | HTOXA_Oxaliplatin_plus_curcumin_vs_oxaliplatin         | 5513                  | 2766 | 2747 |
| between cell lines HT29 and HTOXA | Untreated_HTOXA_vs_HT29                                | 4337                  | 2303 | 2034 |
|                                   | Oxaliplatin_HTOXA_vs_HT29                              | 645                   | 349  | 296  |
|                                   | Oxaliplatin_plus_curcumin_versus_basal_HTOXA_vs_HT29   | 656                   | 261  | 395  |
|                                   | Oxaliplatin_plus_curcumin_vs_oxaliplatin_HTOXA_vs_HT29 | 165                   | 48   | 117  |

**Supplementary Table S2.** Summary of regulated genes among 36,204 genes including unique gene symbols and other transcripts differentially expressed with the combined cut-off thresholds ( $|FC| > 1.2$  and  $q\text{-value} < 0.05$ )



### Supplementary Table S3

| Gene Set Name                              | # Genes in Gene Set (K) | # Genes in Overlap (k) | k/K    | p-value  | FDR q-value |
|--------------------------------------------|-------------------------|------------------------|--------|----------|-------------|
| HALLMARK_INTERFERON_GAMMA_RESPONSE         | 200                     | 11                     | 0.055  | 1.52E-10 | 7.58E-09    |
| HALLMARK_COMPLEMENT                        | 200                     | 8                      | 0.04   | 5.94E-07 | 7.43E-06    |
| HALLMARK_EPITHELIAL_MESENCHYMAL_TRANSITION | 200                     | 8                      | 0.04   | 5.94E-07 | 7.43E-06    |
| HALLMARK_TNFA_SIGNALING_VIA_NFKB           | 200                     | 8                      | 0.04   | 5.94E-07 | 7.43E-06    |
| HALLMARK_INTERFERON_ALPHA_RESPONSE         | 97                      | 6                      | 0.0619 | 1.28E-06 | 1.28E-05    |
| HALLMARK_APOPTOSIS                         | 161                     | 6                      | 0.0373 | 2.37E-05 | 1.97E-04    |
| HALLMARK_HYPOXIA                           | 200                     | 6                      | 0.03   | 7.93E-05 | 4.95E-04    |
| HALLMARK_KRAS_SIGNALING_UP                 | 200                     | 6                      | 0.03   | 7.93E-05 | 4.95E-04    |
| HALLMARK_COAGULATION                       | 138                     | 5                      | 0.0362 | 1.32E-04 | 7.34E-04    |
| HALLMARK_ADIPOGENESIS                      | 200                     | 5                      | 0.025  | 7.26E-04 | 2.59E-03    |
| HALLMARK_ESTROGEN_RESPONSE_LATE            | 200                     | 5                      | 0.025  | 7.26E-04 | 2.59E-03    |
| HALLMARK_MYOGENESIS                        | 200                     | 5                      | 0.025  | 7.26E-04 | 2.59E-03    |
| HALLMARK_P53_PATHWAY                       | 200                     | 5                      | 0.025  | 7.26E-04 | 2.59E-03    |
| HALLMARK_XENOBIOTIC_METABOLISM             | 200                     | 5                      | 0.025  | 7.26E-04 | 2.59E-03    |
| HALLMARK_APICAL_JUNCTION                   | 200                     | 4                      | 0.02   | 5.52E-03 | 1.53E-02    |
| HALLMARK_ESTROGEN_RESPONSE_EARLY           | 200                     | 4                      | 0.02   | 5.52E-03 | 1.53E-02    |
| HALLMARK_GLYCOLYSIS                        | 200                     | 4                      | 0.02   | 5.52E-03 | 1.53E-02    |
| HALLMARK_KRAS_SIGNALING_DN                 | 200                     | 4                      | 0.02   | 5.52E-03 | 1.53E-02    |
| HALLMARK_PEROXISOME                        | 104                     | 3                      | 0.0288 | 5.93E-03 | 1.56E-02    |
| HALLMARK_FATTY_ACID_METABOLISM             | 158                     | 3                      | 0.019  | 1.83E-02 | 4.36E-02    |
| HALLMARK_UV_RESPONSE_UP                    | 158                     | 3                      | 0.019  | 1.83E-02 | 4.36E-02    |

---

| Gene Set Name                              | # Genes in Gene Set (K) | # Genes in Overlap (k) | k/K   | p-value  | FDR q-value |
|--------------------------------------------|-------------------------|------------------------|-------|----------|-------------|
| HALLMARK_TNFA_SIGNALING_VIA_NFKB           | 200                     | 8                      | 0.04  | 7.45E-10 | 3.72E-08    |
| HALLMARK_P53_PATHWAY                       | 200                     | 5                      | 0.025 | 1.33E-05 | 3.33E-04    |
| HALLMARK_INFLAMMATORY_RESPONSE             | 200                     | 4                      | 0.02  | 2.41E-04 | 4.02E-03    |
| HALLMARK_UV_RESPONSE_UP                    | 158                     | 3                      | 0.019 | 1.77E-03 | 2.21E-02    |
| HALLMARK_EPITHELIAL_MESENCHYMAL_TRANSITION | 200                     | 3                      | 0.015 | 3.44E-03 | 2.87E-02    |
| HALLMARK_KRAS_SIGNALING_UP                 | 200                     | 3                      | 0.015 | 3.44E-03 | 2.87E-02    |
| HALLMARK_CHOLESTEROL_HOMEOSTASIS           | 74                      | 2                      | 0.027 | 5.60E-03 | 4.00E-02    |

**Supplementary Table S3.** Significant Hallmark terms enriched in the 194 genes list repressed in resistant under basal conditions and activated by concomitant treatment (upper panel) and in the 75 gene list activated under basal conditions and repressed by combined treatment (lower panel) obtained by GSEA overlap.

**Supplementary Table S4**

| GeneBank Accession n°                              | Gene Name | Fold Change HTOXAR3 vs. HT29 |
|----------------------------------------------------|-----------|------------------------------|
| <b>DNA REPAIR GENES</b>                            |           |                              |
| <i>Poly (ADP-ribose) polymerase (PARP) enzymes</i> |           |                              |
| NM_001618                                          | PARP1     | 1.28                         |
| NM_001003931                                       | PARP3     | 1.25                         |
| <i>Repair of DNA-topoisomerase crosslinks</i>      |           |                              |
| NM_018319                                          | TDP1      | 1.79                         |
| <i>Mismatch excision repair (MMR)</i>              |           |                              |
| NM_002439                                          | MSH3      | 1.27                         |
| NM_014381                                          | MLH3      | 1.41                         |
| NM_000534                                          | PMS1      | -1.78                        |
| <i>Nucleotide excision repair (NER)</i>            |           |                              |
| NM_004344                                          | CETN2     | 1.22                         |
| NM_005316                                          | GTF2H1    | -1.25                        |
| NM_001517                                          | GTF2H4    | 1.61                         |
| NM_001799                                          | CDK7      | 1.30                         |
| NM_002431                                          | MNAT1     | 1.55                         |
| NM_005236                                          | ERCC4     | 1.27                         |
| <i>Homologous Recombination</i>                    |           |                              |
| NM_003579                                          | RAD54L    | 1.34                         |
| NM_012415                                          | RAD54B    | -1.21                        |
| NM_182625                                          | GEN1      | -1.23                        |
| <i>Fanconi Anemia</i>                              |           |                              |
| NM_022725                                          | FANCF     | -1.48                        |
| NM_004629                                          | FANCG     | 1.24                         |
| <i>Non-homologous end-joining</i>                  |           |                              |
| NM_021141                                          | XRCC5     | -1.23                        |
| <i>Modulation of Nucleotide pools</i>              |           |                              |
| NM_015713                                          | RRMB2     | -1.24                        |
| <i>DNA polymerases (catalytic subunits)</i>        |           |                              |
| NM_002912                                          | REV3L     | -1.27                        |
| NM_006502                                          | POLH      | 1.23                         |
| <i>Editing and processing nucleases</i>            |           |                              |
| NM_033629                                          | TREX1     | 1.22                         |
| NM_003686                                          | EXO1      | 1.27                         |
| <i>Ubiquitination and modification</i>             |           |                              |
| NM_152617                                          | RNF8      | 1.22                         |
| <i>Chromatin structure and modification</i>        |           |                              |
| NM_002105                                          | H2AFX     | -1.22                        |
| <b>DNA DAMAGE RESPONSE GENES</b>                   |           |                              |
| NM_001184                                          | ATR       | -1.20                        |
| NM_130384                                          | ATRIP     | 1.26                         |
| NM_002853                                          | RAD1      | -1.26                        |
| NM_007194                                          | CHEK2     | -1.33                        |

**Supplementary Table S4.** List of DNA repair and DNA damage response genes that are differentially expressed between OXA-sensitive and resistant cells ( $|FC| > 1.2$  and  $q\text{-value} < 0.05$ ). Up-regulated DNA repair genes and down-reregulated DNA response genes in HTOXAR3 are highlighted in green.
